# Supplementary material for: Structure and Assembly of the Proteus mirabilis Flagellar Motor by Cryo-Electron Tomography
Source: MDPI journal article supplement (doi:10.3390/ijms24098292), 2023-05-05
Supplement: s1 [file s1]

Movie S1: A cryo-electron tomogram of a vegetative *P. mirabilis* cell illustrating the presence of many fimbriae stemming from the cell. Scale bar is 100 nm.

Movie S2: A cryo-electron tomogram of a swarmer *P. mirabilis* cell illustrating the presence of many peritrichous flagella stemming from the cell. Scale bar is 100 nm.
